# Supplementary material
Source: MDPI journal article supplement (https://www.mdpi.com/2673-4834/3/3/48)
Supplement: s1 [file s1]

**Supplementary material:**

**Table S1.** List of soil profiles and horizons, gypsum values, and Soil Organic Carbon calculations (including, where applicable, the pedotransfer function for calculating bulk densities).

| profile CODE | genetic | gypsum             | SOC stock components |                    |         |    | pedotransfer function BULK DENSITY: |        |                                     |       |           |      |                |      |                     | SOCDi               | Σ SOCDi |
|--------------|---------|--------------------|----------------------|--------------------|---------|----|-------------------------------------|--------|-------------------------------------|-------|-----------|------|----------------|------|---------------------|---------------------|---------|
|              | horizon |                    | mg·g <sup>-1</sup>   | OCi                | BD      | Gi | ti                                  | sand   | BD = 1.398-0.138(SOC) + 0.008(Sand) |       |           |      |                |      |                     |                     |         |
|              |         | mg·g <sup>-1</sup> |                      | g·cm <sup>-3</sup> | decimal | cm | %                                   | cons.1 | cons.2                              | % SOC | c2*(%SOC) | sand | 0.008*(% sand) | BD   | Mg·ha <sup>-1</sup> | Mg·ha <sup>-1</sup> |         |
| BG0044       | Az      | 0                  | 12.7                 | 1.74               | 0.01    | 10 |                                     |        |                                     |       |           |      |                |      | 21.9                | 80.80               |         |
| BG0044       | Btnyz   | 1                  | 7.7                  | 1.86               | 0.01    | 14 |                                     |        |                                     |       |           |      |                |      | 19.9                |                     |         |
| BG0044       | Btnyg1  | 30                 | 3.2                  | 1.91               | 0.01    | 16 |                                     |        |                                     |       |           |      |                |      | 9.7                 |                     |         |
| BG0044       | Btnyg2  | 0                  | 1.8                  | 1.89               | 0.00    | 27 |                                     |        |                                     |       |           |      |                |      | 9.2                 |                     |         |
| BG0044       | Bkg     | 0                  | 1.4                  | 1.94               | 0.00    | 33 |                                     |        |                                     |       |           |      |                |      | 9.0                 |                     |         |
| BG0044       | Bkg1    | 0                  | 1.1                  | 1.99               | 0.01    | 28 |                                     |        |                                     |       |           |      |                |      | 6.1                 |                     |         |
| BG0044       | Bkg2    | 0                  | 0.6                  | 1.93               | 0.05    | 47 |                                     |        |                                     |       |           |      |                |      | 5.2                 |                     |         |
| EG0005       | Ak      | 6                  | 0.1                  | 1.60               | 0.25    | 16 |                                     |        |                                     |       |           |      |                |      | 0.2                 | 1.13                |         |
| EG0005       | 1Ck     | 10                 | 0.3                  | 1.70               | 0.49    | 24 |                                     |        |                                     |       |           |      |                |      | 0.6                 |                     |         |
| EG0005       | 2Ck     | 15                 | 0.0                  | 1.60               | 0.48    | 35 |                                     |        |                                     |       |           |      |                |      | 0.0                 |                     |         |
| EG0005       | 3Cky    | 21                 | 0.1                  | 1.60               | 0.51    | 40 |                                     |        |                                     |       |           |      |                |      | 0.3                 |                     |         |
| EG0007       | Av      | 1                  | 0.7                  |                    | 0.08    | 2  | 44                                  | 1.398  | 0.138                               | 0.070 | 0.0097    | 44   | 0.352          | 1.74 | 0.2                 | 0.53                |         |
| EG0007       | Rzk     | 13                 | 0.1                  |                    | 0.80    | 23 | 54                                  | 1.398  | 0.138                               | 0.010 | 0.0014    | 54   | 0.432          | 1.83 | 0.1                 |                     |         |
| EG0007       | Rkz     | 54                 | 0.4                  |                    | 0.90    | 30 | 52                                  | 1.398  | 0.138                               | 0.040 | 0.0055    | 52   | 0.416          | 1.81 | 0.2                 |                     |         |
| EG0012       | Ak      | 0                  | 0.3                  | 1.30               | 0.13    | 6  |                                     |        |                                     |       |           |      |                |      | 0.2                 | 0.45                |         |
| EG0012       | Bz      | 29                 | 0.3                  | 1.20               | 0.02    | 7  |                                     |        |                                     |       |           |      |                |      | 0.2                 |                     |         |

| profile CODE | genetic | gypsum | SOC stock components |                    |         |    | pedotransfer function BULK DENSITY: |                                     |        |       |           |      |                |      |                     | SOCDi               | Σ SOCDi |
|--------------|---------|--------|----------------------|--------------------|---------|----|-------------------------------------|-------------------------------------|--------|-------|-----------|------|----------------|------|---------------------|---------------------|---------|
|              | horizon |        | mg·g <sup>-1</sup>   | g·cm <sup>-3</sup> | decimal | cm | %                                   | BD = 1.398-0.138(SOC) + 0.008(Sand) |        |       |           |      |                |      |                     |                     |         |
|              |         |        |                      |                    |         |    |                                     | cons.1                              | cons.2 | % SOC | c2*(%SOC) | sand | 0.008*(% sand) | BD   | Mg·ha <sup>-1</sup> | Mg·ha <sup>-1</sup> |         |
| EG0017       | Aky     | 162    | 0.1                  | 1.40               | 0.04    | 7  | 86                                  | 1.398                               | 0.138  | 0.010 | 0.0014    | 86   | 0.688          | 2.08 | 0.1                 | 6.16                |         |
| EG0017       | Cky     | 156    | 0.1                  | 1.30               | 0.01    | 18 | 90                                  | 1.398                               | 0.138  | 0.010 | 0.0014    | 90   | 0.72           | 2.12 | 0.2                 |                     |         |
| EG0017       | 2Cmz    | 159    | 0.1                  |                    | 0.01    | 10 | 58                                  | 1.398                               | 0.138  | 0.010 | 0.0014    | 58   | 0.464          | 1.86 | 0.2                 |                     |         |
| EG0017       | 3Ckz    | 54     | 2.0                  | 1.60               | 0.03    | 15 | 90                                  | 1.398                               | 0.138  | 0.200 | 0.0276    | 90   | 0.720          | 2.09 | 4.7                 |                     |         |
| EG0017       | 3Ckz    | 35     | 0.2                  |                    | 0.19    | 10 | 76                                  | 1.398                               | 0.138  | 0.020 | 0.0028    | 76   | 0.608          | 2.00 | 0.3                 |                     |         |
| EG0017       | Cyz     | 159    | 0.1                  |                    | 0.19    | 40 | 82                                  | 1.398                               | 0.138  | 0.010 | 0.0014    | 82   | 0.656          | 2.05 | 0.7                 |                     |         |
| IL0008       | A       | 0      | 6.1                  |                    | 0.70    | 22 | 31                                  | 1.398                               | 0.138  | 0.610 | 0.0842    | 31   | 0.248          | 1.56 | 6.3                 | 25.45               |         |
| IL0008       | B2ca    | 0      | 5.0                  |                    | 0.30    | 38 | 14                                  | 1.398                               | 0.138  | 0.500 | 0.0690    | 14   | 0.112          | 1.44 | 19.2                |                     |         |
| IL0008       | B3cs    | 230    | 0.0                  |                    | 0.05    | 11 | 18                                  | 1.398                               | 0.138  | 0.000 | 0.0000    | 18   | 0.144          | 1.54 | 0.0                 |                     |         |
| IL0029       | ?       | 81     | 5.5                  |                    | 0.30    | 10 | 58                                  | 1.398                               | 0.138  | 0.550 | 0.0759    | 58   | 0.464          | 1.79 | 6.9                 | 13.16               |         |
| IL0029       | ?       | 31     | 1.7                  |                    | 0.10    | 20 | 85                                  | 1.398                               | 0.138  | 0.170 | 0.0235    | 85   | 0.680          | 2.05 | 6.3                 |                     |         |
| IL0029       | ?       | 14     | 0.0                  |                    | 0.50    | 70 | 82                                  | 1.398                               | 0.138  | 0.000 | 0.0000    | 82   | 0.656          | 2.05 | 0.0                 |                     |         |
| IL0031       | A       | 4      | 1.1                  |                    | 0.20    | 3  | 47                                  | 1.398                               | 0.138  | 0.110 | 0.0152    | 47   | 0.376          | 1.76 | 0.5                 | 5.69                |         |
| IL0031       | B21     | 8      | 0.8                  |                    | 0.20    | 5  | 56                                  | 1.398                               | 0.138  | 0.080 | 0.0110    | 56   | 0.448          | 1.83 | 0.6                 |                     |         |
| IL0031       | B22cs   | 195    | 0.8                  |                    | 0.20    | 14 | 44                                  | 1.398                               | 0.138  | 0.080 | 0.0110    | 44   | 0.352          | 1.74 | 1.6                 |                     |         |
| IL0031       | B23cs   | 148    | 1.0                  |                    | 0.20    | 16 | 65                                  | 1.398                               | 0.138  | 0.100 | 0.0138    | 65   | 0.520          | 1.90 | 2.4                 |                     |         |
| IL0031       | C11cs   | 135    | 1.1                  |                    | 0.80    | 15 | 72                                  | 1.398                               | 0.138  | 0.110 | 0.0152    | 72   | 0.576          | 1.96 | 0.6                 |                     |         |
| IL0031       | C12     | 71     | 0.0                  |                    | 0.80    | 23 | 83                                  | 1.398                               | 0.138  | 0.000 | 0.0000    | 83   | 0.664          | 2.06 | 0.0                 |                     |         |
| IL0032       | A1      | 0      | 0.7                  |                    | 0.05    | 2  | 38                                  | 1.398                               | 0.138  | 0.070 | 0.0097    | 38   | 0.304          | 1.69 | 0.2                 | 9.16                |         |
| IL0032       | A3      | 14     | 0.7                  |                    | 0.10    | 4  | 53                                  | 1.398                               | 0.138  | 0.070 | 0.0097    | 53   | 0.424          | 1.81 | 0.5                 |                     |         |
| IL0032       | B2cs    | 189    | 1.5                  |                    | 0.20    | 15 | 48                                  | 1.398                               | 0.138  | 0.150 | 0.0207    | 48   | 0.384          | 1.76 | 3.2                 |                     |         |

| profile CODE | genetic | gypsum             | SOC stock components |                    |         |    | pedotransfer function BULK DENSITY: |                                     |        |       |           |      |                |      |                     | SOCDi               | Σ SOCDi |
|--------------|---------|--------------------|----------------------|--------------------|---------|----|-------------------------------------|-------------------------------------|--------|-------|-----------|------|----------------|------|---------------------|---------------------|---------|
|              | horizon | mg·g <sup>-1</sup> | OCi                  | BD                 | Gi      | ti | sand                                | BD = 1.398-0.138(SOC) + 0.008(Sand) |        |       |           |      |                |      |                     |                     |         |
|              |         |                    | mg·g <sup>-1</sup>   | g·cm <sup>-3</sup> | decimal | cm | %                                   | cons.1                              | cons.2 | % SOC | c2*(%SOC) | sand | 0.008*(% sand) | BD   | Mg·ha <sup>-1</sup> | Mg·ha <sup>-1</sup> |         |
| IL0032       | B31cs   | 205                | 1.6                  |                    | 0.30    | 17 | 47                                  | 1.398                               | 0.138  | 0.160 | 0.0221    | 47   | 0.376          | 1.75 | 3.3                 |                     |         |
| IL0032       | B32     | 152                | 1.9                  |                    | 0.50    | 12 | 45                                  | 1.398                               | 0.138  | 0.190 | 0.0262    | 45   | 0.360          | 1.73 | 2.0                 |                     |         |
| IL0032       | C1cs    | 245                | 0.0                  |                    | 0.50    | 44 | 25                                  | 1.398                               | 0.138  | 0.000 | 0.0000    | 25   | 0.200          | 1.60 | 0.0                 |                     |         |
| IQ0001       | Ah      | 11                 | 5.4                  |                    | 0.01    | 6  | 30                                  | 1.398                               | 0.138  | 0.540 | 0.0745    | 30   | 0.240          | 1.56 | 5.0                 | 22.21               |         |
| IQ0001       | Cy1     | 600                | 2.5                  |                    | 0.01    | 14 | 32                                  | 1.398                               | 0.138  | 0.250 | 0.0345    | 32   | 0.256          | 1.62 | 5.6                 |                     |         |
| IQ0001       | Cy2     | 482                | 1.5                  |                    | 0.05    | 30 | 35                                  | 1.398                               | 0.138  | 0.150 | 0.0207    | 35   | 0.280          | 1.66 | 7.1                 |                     |         |
| IQ0001       | Cy3     | 567                | 0.6                  |                    | 0.10    | 30 | 44                                  | 1.398                               | 0.138  | 0.060 | 0.0083    | 44   | 0.352          | 1.74 | 2.8                 |                     |         |
| IQ0001       | Cy4     | 551                | 0.4                  |                    | 0.20    | 30 | 44                                  | 1.398                               | 0.138  | 0.040 | 0.0055    | 44   | 0.352          | 1.74 | 1.7                 |                     |         |
| IQ0001       | Cy5     | 488                | 0.0                  |                    | 0.70    | 60 | 46                                  | 1.398                               | 0.138  | 0.000 | 0.0000    | 46   | 0.368          | 1.77 | 0.0                 |                     |         |
| JO0014       | A       | 176                | 4.7                  | 1.44               | 0.00    | 20 |                                     |                                     |        |       |           |      |                |      | 13.5                | 41.26               |         |
| JO0014       | Bw1     | 608                | 1.7                  | 1.22               | 0.00    | 7  |                                     |                                     |        |       |           |      |                |      | 1.5                 |                     |         |
| JO0014       | Bw2     | 697                | 1.0                  | 1.36               | 0.00    | 35 |                                     |                                     |        |       |           |      |                |      | 4.8                 |                     |         |
| JO0014       | Bym     | 599                | 1.4                  | 1.46               | 0.00    | 22 |                                     |                                     |        |       |           |      |                |      | 4.5                 |                     |         |
| JO0014       | Ck1     | 227                | 1.7                  | 0.52               | 0.00    | 16 |                                     |                                     |        |       |           |      |                |      | 1.4                 |                     |         |
| JO0014       | Ck2     | 25                 | 4.0                  | 0.61               | 0.00    | 44 |                                     |                                     |        |       |           |      |                |      | 10.7                |                     |         |
| JO0014       | C       | 42                 | 3.3                  | 0.63               | 0.10    | 26 |                                     |                                     |        |       |           |      |                |      | 4.9                 |                     |         |
| JO0047       | ?       | 14                 | 7.2                  |                    | 0.30    | 18 | 18                                  | 1.398                               | 0.138  | 0.720 | 0.0994    | 18   | 0.144          | 1.44 | 13.1                | 13.09               |         |
| JO0047       | ?       | 18                 | 0.0                  |                    | 0.25    | 32 | 15                                  | 1.398                               | 0.138  | 0.000 | 0.0000    | 15   | 0.120          | 1.52 | 0.0                 |                     |         |
| JO0047       | ?       | 13                 | 0.0                  |                    | 0.02    | 50 | 14                                  | 1.398                               | 0.138  | 0.000 | 0.0000    | 14   | 0.112          | 1.51 | 0.0                 |                     |         |
| OM0003       | Aky     | 57                 | 0.1                  |                    | 0.37    | 18 | 71                                  | 1.398                               | 0.138  | 0.010 | 0.0014    | 71   | 0.568          | 1.96 | 0.2                 | 1.07                |         |
| OM0003       | C1y     | 57                 | 0.1                  |                    | 0.30    | 42 | 74                                  | 1.398                               | 0.138  | 0.010 | 0.0014    | 74   | 0.592          | 1.99 | 0.6                 |                     |         |

| profile CODE | genetic | gypsum             | SOC stock components |                    |         |    | pedotransfer function BULK DENSITY: |                                     |        |       |           |      |                |      |                     | SOCDi               | Σ SOCDi |
|--------------|---------|--------------------|----------------------|--------------------|---------|----|-------------------------------------|-------------------------------------|--------|-------|-----------|------|----------------|------|---------------------|---------------------|---------|
|              | horizon | mg·g <sup>-1</sup> | OCi                  | BD                 | Gi      | ti | sand                                | BD = 1.398-0.138(SOC) + 0.008(Sand) |        |       |           |      |                |      |                     |                     |         |
|              |         |                    | mg·g <sup>-1</sup>   | g·cm <sup>-3</sup> | decimal | cm | %                                   | cons.1                              | cons.2 | % SOC | c2*(%SOC) | sand | 0.008*(% sand) | BD   | Mg·ha <sup>-1</sup> | Mg·ha <sup>-1</sup> |         |
| OM0003       | C1y     | 101                | 0.1                  |                    | 0.58    | 30 | 87                                  | 1.398                               | 0.138  | 0.010 | 0.0014    | 87   | 0.696          | 2.09 | 0.3                 |                     |         |
| OM0004       | A1z     | 116                | 17.6                 |                    | 0.36    | 4  | 48                                  | 1.398                               | 0.138  | 1.760 | 0.2429    | 48   | 0.384          | 1.54 | 6.9                 | 48.39               |         |
| OM0004       | A2z     | 0                  | 9.8                  |                    | 0.37    | 24 | 32                                  | 1.398                               | 0.138  | 0.980 | 0.1352    | 32   | 0.256          | 1.52 | 22.5                |                     |         |
| OM0004       | C1      | 0                  | 3.7                  |                    | 0.15    | 32 | 67                                  | 1.398                               | 0.138  | 0.370 | 0.0511    | 67   | 0.536          | 1.88 | 18.9                |                     |         |
| OM0004       | C2kg    | 0                  | 0.0                  |                    | 0.36    | 35 | 28                                  | 1.398                               | 0.138  | 0.000 | 0.0000    | 28   | 0.224          | 1.62 | 0.0                 |                     |         |
| OM0004       | C3g     | 0                  | 0.0                  |                    | 0.33    | 5  | 23                                  | 1.398                               | 0.138  | 0.000 | 0.0000    | 23   | 0.184          | 1.58 | 0.0                 |                     |         |
| OM0006       | Ap      | 78                 | 3.1                  |                    | 0.36    | 20 | 73                                  | 1.398                               | 0.138  | 0.310 | 0.0428    | 73   | 0.584          | 1.94 | 7.7                 | 26.27               |         |
| OM0006       | C1y     | 129                | 1.4                  |                    | 0.44    | 25 | 85                                  | 1.398                               | 0.138  | 0.140 | 0.0193    | 85   | 0.680          | 2.06 | 4.0                 |                     |         |
| OM0006       | C2y     | 116                | 4.9                  |                    | 0.25    | 20 | 81                                  | 1.398                               | 0.138  | 0.490 | 0.0676    | 81   | 0.648          | 1.98 | 14.5                |                     |         |
| OM0006       | C3y     | 108                | 0.0                  |                    | 0.51    | 25 | 86                                  | 1.398                               | 0.138  | 0.000 | 0.0000    | 86   | 0.688          | 2.09 | 0.0                 |                     |         |
| OM0006       | C4y     | 9                  | 0.0                  |                    | 0.28    | 20 | 86                                  | 1.398                               | 0.138  | 0.000 | 0.0000    | 86   | 0.688          | 2.09 | 0.0                 |                     |         |
| OM0006       | C5y     | 24                 | 0.0                  |                    | 0.44    | 50 | 83                                  | 1.398                               | 0.138  | 0.000 | 0.0000    | 83   | 0.664          | 2.06 | 0.0                 |                     |         |
| SO0012       | A       | 0                  | 6.8                  | 1.69               | 0.00    | 16 |                                     |                                     |        |       |           |      |                |      | 18.4                | 169.59              |         |
| SO0012       | Bw1     | 0                  | 5.1                  | 1.52               | 0.01    | 23 |                                     |                                     |        |       |           |      |                |      | 17.7                |                     |         |
| SO0012       | Bw2     | 30                 | 4.3                  | 1.33               | 0.01    | 23 |                                     |                                     |        |       |           |      |                |      | 13.0                |                     |         |
| SO0012       | Bw3     | 10                 | 6.0                  | 1.61               | 0.00    | 45 |                                     |                                     |        |       |           |      |                |      | 43.5                |                     |         |
| SO0012       | Bw4     | 0                  | 4.9                  | 1.69               | 0.01    | 94 |                                     |                                     |        |       |           |      |                |      | 77.1                |                     |         |
| SO0015       | Ap1     | 0                  | 8.5                  |                    | 0.01    | 10 | 7                                   | 1.398                               | 0.138  | 0.850 | 0.1173    | 7    | 0.056          | 1.34 | 11.2                | 101.13              |         |
| SO0015       | Ap2     | 0                  | 6.7                  | 1.62               | 0.00    | 10 | 9                                   | 1.398                               | 0.138  | 0.670 | 0.0925    | 9    | 0.072          | 1.38 | 9.2                 |                     |         |
| SO0015       | AB      | 0                  | 6.2                  | 1.63               | 0.01    | 17 | 8                                   | 1.398                               | 0.138  | 0.620 | 0.0856    | 8    | 0.064          | 1.38 | 14.4                |                     |         |
| SO0015       | Bw1     | 40                 | 4.4                  | 1.65               | 0.01    | 53 | 12                                  | 1.398                               | 0.138  | 0.440 | 0.0607    | 12   | 0.096          | 1.43 | 33.1                |                     |         |

| profile CODE | genetic | gypsum             | SOC stock components |                    |         |    | pedotransfer function BULK DENSITY: |                                     |        |       |           |      |                |      |                     | SOCDi               | Σ SOCDi |
|--------------|---------|--------------------|----------------------|--------------------|---------|----|-------------------------------------|-------------------------------------|--------|-------|-----------|------|----------------|------|---------------------|---------------------|---------|
|              | horizon | mg·g <sup>-1</sup> | OCi                  | BD                 | Gi      | ti | sand                                | BD = 1.398-0.138(SOC) + 0.008(Sand) |        |       |           |      |                |      |                     |                     |         |
|              |         |                    | mg·g <sup>-1</sup>   | g·cm <sup>-3</sup> | decimal | cm | %                                   | cons.1                              | cons.2 | % SOC | c2*(%SOC) | sand | 0.008*(% sand) | BD   | Mg·ha <sup>-1</sup> | Mg·ha <sup>-1</sup> |         |
| SO0015       | Bw2     | 30                 | 3.7                  | 1.69               | 0.00    | 20 | 11                                  | 1.398                               | 0.138  | 0.370 | 0.0511    | 11   | 0.088          | 1.43 | 10.6                |                     |         |
| SO0015       | Nk      | 40                 | 3.2                  | 1.75               | 0.01    | 50 | 9                                   | 1.398                               | 0.138  | 0.320 | 0.0442    | 9    | 0.072          | 1.43 | 22.6                |                     |         |
| SY0026       | Ap      | 1                  | 2.9                  |                    | 0.25    | 20 | 52                                  | 1.398                               | 0.138  | 0.290 | 0.0400    | 52   | 0.416          | 1.77 | 7.7                 | 29.17               |         |
| SY0026       | C1      | 0                  | 1.8                  |                    | 0.28    | 35 | 61                                  | 1.398                               | 0.138  | 0.180 | 0.0248    | 61   | 0.488          | 1.86 | 8.4                 |                     |         |
| SY0026       | C2      | 80                 | 1.1                  |                    | 0.65    | 45 | 89                                  | 1.398                               | 0.138  | 0.110 | 0.0152    | 89   | 0.712          | 2.09 | 3.6                 |                     |         |
| SY0026       | C3      | 110                | 1.2                  |                    | 0.75    | 15 | 62                                  | 1.398                               | 0.138  | 0.120 | 0.0166    | 62   | 0.496          | 1.88 | 0.8                 |                     |         |
| SY0026       | C4      | 60                 | 1.1                  |                    | 0.02    | 45 | 47                                  | 1.398                               | 0.138  | 0.110 | 0.0152    | 47   | 0.376          | 1.76 | 8.5                 |                     |         |
| SY0046       | A       | 0                  | 5.3                  |                    | 0.15    | 12 | 41                                  | 1.398                               | 0.138  | 0.530 | 0.0731    | 41   | 0.328          | 1.65 | 8.9                 | 21.02               |         |
| SY0046       | B1ca    | 0                  | 1.8                  |                    | 0.05    | 28 | 27                                  | 1.398                               | 0.138  | 0.180 | 0.0248    | 27   | 0.216          | 1.59 | 7.6                 |                     |         |
| SY0046       | B2ca    | 230                | 1.3                  |                    | 0.02    | 22 | 27                                  | 1.398                               | 0.138  | 0.130 | 0.0179    | 27   | 0.216          | 1.60 | 4.5                 |                     |         |
| SY0058       | ?       | 0                  | 6.2                  | 1.40               | 0.04    | 15 |                                     |                                     |        |       |           |      |                |      | 12.5                | 53.92               |         |
| SY0058       | ?       | 0                  | 4.3                  | 1.41               | 0.10    | 15 |                                     |                                     |        |       |           |      |                |      | 8.2                 |                     |         |
| SY0058       | ?       | 0                  | 4.2                  | 1.42               | 0.10    | 48 |                                     |                                     |        |       |           |      |                |      | 25.8                |                     |         |
| SY0058       | ?       | 70                 | 3.3                  | 1.43               | 0.28    | 22 |                                     |                                     |        |       |           |      |                |      | 7.5                 |                     |         |
| SY0060       | Ap      | 0                  | 10.1                 | 1.44               | 0.01    | 18 |                                     |                                     |        |       |           |      |                |      | 25.9                | 64.78               |         |
| SY0060       | B21ca   | 0                  | 6                    | 1.47               | 0.01    | 15 |                                     |                                     |        |       |           |      |                |      | 13.1                |                     |         |
| SY0060       | B22ca   | 1                  | 4.2                  | 1.46               | 0.01    | 24 |                                     |                                     |        |       |           |      |                |      | 14.6                |                     |         |
| SY0060       | Ccs     | 800                | 1.3                  | 1.50               | 0.01    | 58 |                                     |                                     |        |       |           |      |                |      | 11.2                |                     |         |
| SY0063       | C1      | 1                  | 7.4                  |                    | 0.00    | 1  | 55                                  | 1.398                               | 0.138  | 0.740 | 0.1021    | 55   | 0.440          | 1.74 | 1.3                 | 42.43               |         |
| SY0063       | C2cs    | 890                | 2.7                  |                    | 0.00    | 39 | 68                                  | 1.398                               | 0.138  | 0.270 | 0.0373    | 68   | 0.544          | 1.90 | 20.1                |                     |         |

| profile CODE | genetic | gypsum | SOC stock components |                    |         |    | pedotransfer function BULK DENSITY: |                                     |        |       |           |      |                |      |                     | SOCDi               | Σ SOCDi |
|--------------|---------|--------|----------------------|--------------------|---------|----|-------------------------------------|-------------------------------------|--------|-------|-----------|------|----------------|------|---------------------|---------------------|---------|
|              | horizon |        | mg·g <sup>-1</sup>   | g·cm <sup>-3</sup> | decimal | cm | %                                   | BD = 1.398-0.138(SOC) + 0.008(Sand) |        |       |           |      |                |      |                     |                     |         |
|              |         |        |                      |                    |         |    |                                     | cons.1                              | cons.2 | % SOC | c2*(%SOC) | sand | 0.008*(% sand) | BD   | Mg·ha <sup>-1</sup> | Mg·ha <sup>-1</sup> |         |
| SY0063       | C3cs    | 910    | 2.3                  |                    | 0.00    | 30 | 73                                  | 1.398                               | 0.138  | 0.230 | 0.0317    | 73   | 0.584          | 1.95 | 13.5                |                     |         |
| SY0063       | C4cs    | 830    | 1.3                  |                    | 0.00    | 30 | 72                                  | 1.398                               | 0.138  | 0.130 | 0.0179    | 72   | 0.576          | 1.96 | 7.6                 |                     |         |
| US0011       | Ap      | 0      | 14.0                 |                    | 0.00    | 15 | 4                                   | 1.398                               | 0.138  | 1.400 | 0.1932    | 4    | 0.032          | 1.24 | 26.0                | 121.22              |         |
| US0011       | Bw      | 0      | 10.4                 |                    | 0.00    | 13 | 4                                   | 1.398                               | 0.138  | 1.040 | 0.1435    | 4    | 0.032          | 1.29 | 17.4                |                     |         |
| US0011       | Bk      | 0      | 7.6                  |                    | 0.00    | 28 | 2                                   | 1.398                               | 0.138  | 0.760 | 0.1049    | 2    | 0.016          | 1.31 | 27.9                |                     |         |
| US0011       | By      | 80     | 4.6                  |                    | 0.01    | 30 | 8                                   | 1.398                               | 0.138  | 0.460 | 0.0635    | 8    | 0.064          | 1.40 | 19.1                |                     |         |
| US0011       | C       | 30     | 3.3                  |                    | 0.01    | 66 | 10                                  | 1.398                               | 0.138  | 0.330 | 0.0455    | 10   | 0.080          | 1.43 | 30.9                |                     |         |
| US0132       | A       | 0      | 7.2                  | 1.40               | 0       | 10 | 38                                  |                                     |        |       |           |      |                |      | 10.1                | 48.66               |         |
| US0132       | By      | 60     | 2.3                  | 1.41               | 0       | 43 | 39                                  |                                     |        |       |           |      |                |      | 13.9                |                     |         |
| US0132       | C1      | 30     | 2.9                  | 1.57               | 0       | 18 | 3                                   |                                     |        |       |           |      |                |      | 8.2                 |                     |         |
| US0132       | C2      | 20     | 1.3                  | 1.53               | 0       | 64 | 33                                  |                                     |        |       |           |      |                |      | 12.7                |                     |         |
| US0132       | 2C      | 60     | 3.6                  | 1.52               | 0       | 5  | 4                                   |                                     |        |       |           |      |                |      | 2.7                 |                     |         |
| US0132       | 3C      | 20     | 0.2                  | 1.51               | 0       | 43 | 40                                  |                                     |        |       |           |      |                |      | 1.0                 |                     |         |
| US0134       | Ap      | 0      | 8.7                  | 1.69               | 0       | 11 | 32                                  | 1.398                               | 0.138  | 0.870 | 0.1201    | 32   | 0.256          | 1.53 | 14.7                | 140.71              |         |
| US0134       | B       | 0      | 6.9                  | 1.77               | 0       | 15 | 28                                  | 1.398                               | 0.138  | 0.690 | 0.0952    | 28   | 0.224          | 1.53 | 15.8                |                     |         |
| US0134       | Bk      | 1      | 5.6                  | 1.79               | 0       | 17 | 27                                  | 1.398                               | 0.138  | 0.560 | 0.0773    | 27   | 0.216          | 1.54 | 14.6                |                     |         |
| US0134       | By1     | 1      | 5.3                  |                    | 0       | 15 | 23                                  | 1.398                               | 0.138  | 0.530 | 0.0731    | 23   | 0.184          | 1.51 | 12.0                |                     |         |
| US0134       | By2     | 10     | 4.5                  | 1.88               | 0       | 42 | 18                                  | 1.398                               | 0.138  | 0.450 | 0.0621    | 18   | 0.144          | 1.48 | 28.0                |                     |         |
| US0134       | 2C1     | 1      | 4.8                  | 1.59               | 0       | 48 | 21                                  | 1.398                               | 0.138  | 0.480 | 0.0662    | 21   | 0.168          | 1.50 | 34.6                |                     |         |
| US0134       | 2C2     | 10     | 2.4                  |                    | 0       | 50 | 49                                  | 1.398                               | 0.138  | 0.240 | 0.0331    | 49   | 0.392          | 1.76 | 21.1                |                     |         |
| US0135       | A       | 0      | 29.8                 | 1.62               | 0.02    | 6  | 8                                   | 1.398                               | 0.138  | 2.980 | 0.4112    | 8    | 0.064          | 1.05 | 18.4                | 139.62              |         |

| profile CODE | genetic | gypsum             | SOC stock components |                    |         |    | pedotransfer function BULK DENSITY: |        |                                     |       |           |        |                |       |                     | SOCDi               | Σ SOCDi |
|--------------|---------|--------------------|----------------------|--------------------|---------|----|-------------------------------------|--------|-------------------------------------|-------|-----------|--------|----------------|-------|---------------------|---------------------|---------|
|              | horizon |                    | mg·g <sup>-1</sup>   | OCi                | BD      | Gi | ti                                  | sand   | BD = 1.398-0.138(SOC) + 0.008(Sand) |       |           |        |                |       |                     |                     |         |
|              |         | mg·g <sup>-1</sup> |                      | g·cm <sup>-3</sup> | decimal | cm | %                                   | cons.1 | cons.2                              | % SOC | c2*(%SOC) | sand   | 0.008*(% sand) | BD    | Mg·ha <sup>-1</sup> | Mg·ha <sup>-1</sup> |         |
| US0135       | B1      | 0                  | 11.0                 |                    | 0.03    | 21 | 6                                   | 1.398  | 0.138                               | 1.100 | 0.1518    | 6      | 0.048          | 1.29  | 29.0                |                     |         |
| US0135       | B2      |                    | 0                    | 9.4                | 1.79    |    | 0.02                                | 18     | 5                                   | 1.398 | 0.138     | 0.940  | 0.1297         | 5     | 0.040               |                     | 1.31    |
| US0135       | B3      | 50                 | 8.4                  |                    | 0.03    | 17 | 4                                   | 1.398  | 0.138                               | 0.840 | 0.1159    | 4      | 0.032          | 1.31  | 18.2                |                     |         |
| US0135       | By1     | 210                | 6.4                  | 1.67               | 0.05    |    | 26                                  | 3      | 1.398                               | 0.138 | 0.640     | 0.0883 | 3              | 0.024 | 1.33                |                     | 21.1    |
| US0135       | By2     | 110                | 5.3                  |                    | 0.02    | 27 | 2                                   | 1.398  | 0.138                               | 0.530 | 0.0731    | 2      | 0.016          | 1.34  | 18.8                |                     |         |
| US0135       | By3     | 230                | 3.6                  | 1.82               | 0.00    |    | 25                                  | 4      | 1.398                               | 0.138 | 0.360     | 0.0497 | 4              | 0.032 | 1.38                |                     | 12.4    |
| US0153       | A       | 0                  | 14.3                 |                    | 0       | 10 | 22                                  | 1.398  | 0.138                               | 1.430 | 0.1973    | 22     | 0.176          | 1.38  | 19.7                | 116.65              |         |
| US0153       | Bw      | 0                  | 9.3                  |                    | 0       | 18 | 15                                  | 1.398  | 0.138                               | 0.930 | 0.1283    | 15     | 0.120          | 1.39  | 23.3                |                     |         |
| US0153       | Bk1     | 0                  | 6.3                  |                    | 0       | 25 | 9                                   | 1.398  | 0.138                               | 0.630 | 0.0869    | 9      | 0.072          | 1.38  | 21.8                |                     |         |
| US0153       | Bk2     | 0                  | 8.6                  |                    | 0       | 23 | 2                                   | 1.398  | 0.138                               | 0.860 | 0.1187    | 2      | 0.016          | 1.30  | 25.6                |                     |         |
| US0153       | Bky     | 70                 | 2.5                  |                    | 0       | 15 | 5                                   | 1.398  | 0.138                               | 0.250 | 0.0345    | 5      | 0.040          | 1.40  | 5.3                 |                     |         |
| US0153       | BC      | 50                 | 2.5                  |                    | 0       | 61 | 2                                   | 1.398  | 0.138                               | 0.250 | 0.0345    | 2      | 0.016          | 1.38  | 21.0                |                     |         |
| US0163       | E       | 0                  | 15.0                 | 1.41               | 0       | 5  | 13                                  | 1.398  | 0.138                               | 1.500 | 0.2070    | 13     | 0.104          | 1.30  | 9.7                 | 95.53               |         |
| US0163       | Bt      | 0                  | 8.0                  | 1.55               | 0       | 18 |                                     | 6      | 1.398                               | 0.138 | 0.800     | 0.1104 | 6              | 0.048 | 1.34                |                     | 19.2    |
| US0163       | Btz     | 20                 | 5.0                  |                    | 0       | 41 |                                     | 4      | 1.398                               | 0.138 | 0.500     | 0.0690 | 4              | 0.032 | 1.36                |                     | 27.9    |
| US0163       | Bz      | 20                 | 3.0                  |                    | 0       | 40 |                                     | 7      | 1.398                               | 0.138 | 0.300     | 0.0414 | 7              | 0.056 | 1.41                |                     | 17.0    |
| US0163       | Byz     | 10                 | 3.0                  | 1.95               | 0       | 51 |                                     | 8      | 1.398                               | 0.138 | 0.300     | 0.0414 | 8              | 0.064 | 1.42                |                     | 21.7    |
| US0165       | A       | 0                  | 15.0                 | 1.55               | 0       | 8  | 5                                   | 1.398  | 0.138                               | 1.500 | 0.2070    | 5      | 0.040          | 1.23  | 14.8                | 83.34               |         |
| US0165       | B1      | 0                  | 7.0                  |                    | 0       | 18 | 4                                   | 1.398  | 0.138                               | 0.700 | 0.0966    | 4      | 0.032          | 1.33  | 16.8                |                     |         |
| US0165       | B2      | 1                  | 5.0                  | 1.91               | 0       | 63 | 3                                   | 1.398  | 0.138                               | 0.500 | 0.0690    | 3      | 0.024          | 1.35  | 42.6                |                     |         |
| US0165       | C       | 20                 | 2.0                  |                    | 0       | 33 | 2                                   | 1.398  | 0.138                               | 0.200 | 0.0276    | 2      | 0.016          | 1.39  | 9.2                 |                     |         |

| profile CODE | genetic | gypsum             | SOC stock components |                    |         |    | pedotransfer function BULK DENSITY: |        |                                     |       |           |      |                |      |                     | SOCDi               | Σ SOCDi |
|--------------|---------|--------------------|----------------------|--------------------|---------|----|-------------------------------------|--------|-------------------------------------|-------|-----------|------|----------------|------|---------------------|---------------------|---------|
|              | horizon |                    | mg·g <sup>-1</sup>   | OCi                | BD      | Gi | ti                                  | sand   | BD = 1.398-0.138(SOC) + 0.008(Sand) |       |           |      |                |      |                     |                     |         |
|              |         | mg·g <sup>-1</sup> |                      | g·cm <sup>-3</sup> | decimal | cm | %                                   | cons.1 | cons.2                              | % SOC | c2*(%SOC) | sand | 0.008*(% sand) | BD   | Mg·ha <sup>-1</sup> | Mg·ha <sup>-1</sup> |         |
| US0199       | Ap      | 0                  | 12.9                 | 1.60               | 0.01    | 13 | 16                                  |        |                                     |       |           |      |                |      | 26.6                | 226.41              |         |
| US0199       | Bt1     | 0                  | 11.3                 | 1.61               | 0.00    | 20 | 14                                  |        |                                     |       |           |      |                |      |                     |                     |         |
| US0199       | Bt2     | 0                  | 6.3                  | 1.64               | 0.00    | 26 | 23                                  |        |                                     |       |           |      |                |      |                     |                     |         |
| US0199       | Bk      | 0                  | 5.2                  | 1.80               | 0.00    | 31 | 6                                   |        |                                     |       |           |      |                |      |                     |                     |         |
| US0199       | C11     | 150                | 4.1                  | 1.48               | 0.01    | 42 | 9                                   |        |                                     |       |           |      |                |      |                     |                     |         |
| US0199       | C12     | 60                 | 5.1                  | 1.64               | 0.01    | 13 | 8                                   |        |                                     |       |           |      |                |      |                     |                     |         |
| US0199       | C21     | 20                 | 4.8                  | 1.62               | 0.00    | 38 | 8                                   |        |                                     |       |           |      |                |      |                     |                     |         |
| US0199       | C32     | 10                 | 4.4                  | 1.65               | 0.00    | 30 | 36                                  |        |                                     |       |           |      |                |      |                     |                     |         |
| US0199       | C3      | 20                 | 4.0                  | 1.65               | 0.01    | 31 | 29                                  |        |                                     |       |           |      |                |      |                     |                     |         |
| US0206       | A       | 0                  | 14.1                 |                    | 0.00    | 10 | 33                                  | 1.398  | 0.138                               | 1.410 | 0.1946    | 33   | 0.264          | 1.47 | 20.7                | 114.69              |         |
| US0206       | Bt      | 0                  | 9.8                  | 1.65               | 0.00    | 13 | 19                                  | 1.398  | 0.138                               | 0.980 | 0.1352    | 19   | 0.152          | 1.41 | 18.0                |                     |         |
| US0206       | Btz     | 240                | 4.0                  | 1.51               | 0.00    | 30 | 16                                  | 1.398  | 0.138                               | 0.400 | 0.0552    | 16   | 0.128          | 1.47 | 17.6                |                     |         |
| US0206       | Bz      | 10                 | 3.5                  | 1.93               | 0.00    | 31 | 24                                  | 1.398  | 0.138                               | 0.350 | 0.0483    | 24   | 0.192          | 1.54 | 16.7                |                     |         |
| US0206       | C1      | 20                 | 2.5                  | 1.87               | 0.00    | 30 | 38                                  | 1.398  | 0.138                               | 0.250 | 0.0345    | 38   | 0.304          | 1.67 | 12.5                |                     |         |
| US0206       | C2      | 0                  | 1.7                  | 1.68               | 0.00    | 31 | 51                                  | 1.398  | 0.138                               | 0.170 | 0.0235    | 51   | 0.408          | 1.78 | 9.4                 |                     |         |
| US0206       | 2C      | 40                 | 4.0                  | 2.00               | 0.00    | 35 | 8                                   | 1.398  | 0.138                               | 0.400 | 0.0552    | 8    | 0.064          | 1.41 | 19.7                |                     |         |
| US0355       | A       | 0                  | 33.1                 |                    | 0.02    | 5  | 50                                  | 1.398  | 0.138                               | 3.310 | 0.4568    | 50   | 0.400          | 1.34 | 21.8                | 160.25              |         |
| US0355       | E       | 0                  | 10                   |                    | 0.02    | 8  | 49                                  | 1.398  | 0.138                               | 1.000 | 0.1380    | 49   | 0.392          | 1.65 | 13.0                |                     |         |
| US0355       | Bt1     | 0                  | 7.9                  | 1.67               | 0.02    | 15 | 30                                  | 1.398  | 0.138                               | 0.790 | 0.1090    | 30   | 0.240          | 1.53 | 17.8                |                     |         |
| US0355       | Bt2     | 0                  | 9                    | 1.64               | 0.02    | 10 | 28                                  | 1.398  | 0.138                               | 0.900 | 0.1242    | 28   | 0.224          | 1.50 | 13.2                |                     |         |
| US0355       | Bk      | 0                  | 5.9                  | 1.78               | 0.02    | 26 | 29                                  | 1.398  | 0.138                               | 0.590 | 0.0814    | 29   | 0.232          | 1.55 | 23.3                |                     |         |



| profile CODE    | genetic | gypsum             | SOC stock components |                    |         |    | pedotransfer function BULK DENSITY: |                                     |        |       |           |      |                |    |                     | SOCDi               | Σ SOCDi |
|-----------------|---------|--------------------|----------------------|--------------------|---------|----|-------------------------------------|-------------------------------------|--------|-------|-----------|------|----------------|----|---------------------|---------------------|---------|
|                 | horizon | mg·g <sup>-1</sup> | OCi                  | BD                 | Gi      | ti | sand                                | BD = 1.398-0.138(SOC) + 0.008(Sand) |        |       |           |      |                |    |                     |                     |         |
|                 |         |                    | mg·g <sup>-1</sup>   | g·cm <sup>-3</sup> | decimal | cm | %                                   | cons.1                              | cons.2 | % SOC | c2*(%SOC) | sand | 0.008*(% sand) | BD | Mg·ha <sup>-1</sup> | Mg·ha <sup>-1</sup> |         |
| US0399          | A1      | 0                  | 8.6                  | 1.80               | 0.00    | 13 | 7                                   |                                     |        |       |           |      |                |    | 20.1                |                     |         |
| US0399          | A2      | 0                  | 7.5                  | 1.82               | 0.00    | 25 | 7                                   |                                     |        |       |           |      |                |    |                     |                     |         |
| US0399          | A3      | 0                  | 6.2                  | 1.84               | 0.00    | 16 | 6                                   |                                     |        |       |           |      |                |    |                     |                     |         |
| US0399          | By1     | 30                 | 5.6                  | 1.73               | 0.00    | 22 | 10                                  |                                     |        |       |           |      |                |    |                     |                     |         |
| US0399          | By2     | 20                 | 4.3                  | 1.66               | 0.00    | 31 | 10                                  |                                     |        |       |           |      |                |    |                     |                     |         |
| Villaconejos I  | Ap      |                    | 4.41                 | 1.38               | 0.28    | 27 |                                     |                                     |        |       |           |      |                |    | 11.8                | 61.06               |         |
|                 | Byz1    | *                  | 5.28                 | 1.35               | 0.28    | 45 |                                     |                                     |        |       |           |      |                |    |                     |                     |         |
|                 | Byz2    | *                  | 3.36                 | 1.38               | 0.27    | 24 |                                     |                                     |        |       |           |      |                |    |                     |                     |         |
|                 | C       |                    | 0.93                 | 1.43               | 0.29    | 38 |                                     |                                     |        |       |           |      |                |    |                     |                     |         |
|                 | Cyz     | *                  | 2.61                 | 1.40               | 0.12    | 45 |                                     |                                     |        |       |           |      |                |    |                     |                     |         |
| Villaconejos II | Ap      |                    | 2.96                 | 1.41               | 0.26    | 19 |                                     |                                     |        |       |           |      |                |    | 5.8                 | 31.42               |         |
|                 | Cym     | *                  | 1.91                 | 1.43               | 0.29    | 73 |                                     |                                     |        |       |           |      |                |    |                     |                     |         |
|                 | Cyz1    | *                  | 1.57                 | 1.43               | 0.11    | 28 |                                     |                                     |        |       |           |      |                |    |                     |                     |         |
|                 | Cyz2    | *                  | 2.15                 | 1.41               | 0.36    | 30 |                                     |                                     |        |       |           |      |                |    |                     |                     |         |
| Villaconejos IV | Ap      |                    | 7.42                 | 1.33               | 0.22    | 23 |                                     |                                     |        |       |           |      |                |    | 17.8                | 94.72               |         |
|                 | Byz     | *                  | 6.73                 | 1.34               | 0.28    | 62 |                                     |                                     |        |       |           |      |                |    |                     |                     |         |
|                 | BCyz    | *                  | 5.16                 | 1.36               | 0.20    | 35 |                                     |                                     |        |       |           |      |                |    |                     |                     |         |
|                 | Cyz     | *                  | 4.29                 | 1.37               | 0.28    | 40 |                                     |                                     |        |       |           |      |                |    |                     |                     |         |
| Arganda         | Ap      |                    | 3.07                 | 1.41               | 0.29    | 12 |                                     |                                     |        |       |           |      |                |    | 3.7                 | 74.91               |         |
|                 | By      | *                  | 5.39                 | 1.37               | 0.35    | 74 |                                     |                                     |        |       |           |      |                |    |                     |                     |         |
|                 | Cy1     | *                  | 3.89                 | 1.40               | 0.37    | 29 |                                     |                                     |        |       |           |      |                |    |                     |                     |         |
|                 | Cy2     | *                  | 2.96                 | 1.42               | 0.39    | 17 |                                     |                                     |        |       |           |      |                |    |                     |                     |         |

| profile CODE                                | genetic | gypsum             | SOC stock components |                    |         |     | pedotransfer function BULK DENSITY: |                                     |        |       |           |      |                |    | SOCDi               | Σ SOCDi             |        |
|---------------------------------------------|---------|--------------------|----------------------|--------------------|---------|-----|-------------------------------------|-------------------------------------|--------|-------|-----------|------|----------------|----|---------------------|---------------------|--------|
|                                             | horizon | mg·g <sup>-1</sup> | OCi                  | BD                 | Gi      | ti  | sand                                | BD = 1.398-0.138(SOC) + 0.008(Sand) |        |       |           |      |                |    |                     |                     |        |
|                                             |         |                    | mg·g <sup>-1</sup>   | g·cm <sup>-3</sup> | decimal | cm  | %                                   | cons.1                              | cons.2 | % SOC | c2*(%SOC) | sand | 0.008*(% sand) | BD | Mg·ha <sup>-1</sup> | Mg·ha <sup>-1</sup> |        |
|                                             | Cy3     | *                  | 3.94                 | 1.40               | 0.35    | 28  |                                     |                                     |        |       |           |      |                |    |                     | 10.1                |        |
|                                             | Cy4     | *                  | 2.90                 | 1.42               | 0.22    | 35  |                                     |                                     |        |       |           |      |                |    |                     | 11.3                |        |
| Chinchón I                                  | Ap1     |                    | 15.49                | 1.21               | 0.32    | 10  |                                     |                                     |        |       |           |      |                |    |                     | 12.7                | 113.83 |
|                                             | Ap2     |                    | 11.43                | 1.26               | 0.36    | 12  |                                     |                                     |        |       |           |      |                |    |                     | 11.1                |        |
|                                             | By      | *                  | 6.61                 | 1.35               | 0.39    | 103 |                                     |                                     |        |       |           |      |                |    |                     | 56.0                |        |
|                                             | Cy      | *                  | 6.55                 | 1.35               | 0.30    | 45  |                                     |                                     |        |       |           |      |                |    |                     | 27.9                |        |
|                                             | Cy2     | *                  | 7.25                 | 1.35               | 0.38    | 10  |                                     |                                     |        |       |           |      |                |    |                     | 6.1                 |        |
| Carabaña                                    | Ap      |                    | 5.05                 | 1.39               | 0.37    | 21  |                                     |                                     |        |       |           |      |                |    |                     | 9.3                 | 66.73  |
|                                             | By      | *                  | 5.05                 | 1.37               | 0.39    | 28  |                                     |                                     |        |       |           |      |                |    |                     | 11.8                |        |
|                                             | Cy1     | *                  | 4.41                 | 1.39               | 0.19    | 33  |                                     |                                     |        |       |           |      |                |    |                     | 16.4                |        |
|                                             | Cy2     | *                  | 7.60                 | 1.39               | 0.23    | 36  |                                     |                                     |        |       |           |      |                |    |                     | 29.3                |        |
| Valdaracete                                 | Ap      |                    | 4.06                 | 1.41               | 0.34    | 21  |                                     |                                     |        |       |           |      |                |    |                     | 7.9                 | 31.30  |
|                                             | Cky2    | *                  | 2.20                 | 1.45               | 0.34    | 17  |                                     |                                     |        |       |           |      |                |    |                     | 3.6                 |        |
|                                             | Cky3    | *                  | 1.04                 | 1.51               | 0.30    | 62  |                                     |                                     |        |       |           |      |                |    |                     | 6.8                 |        |
|                                             | 2Cky1   | *                  | 2.38                 | 1.42               | 0.36    | 60  |                                     |                                     |        |       |           |      |                |    |                     | 13.0                |        |
| Colmenar I                                  | Ap      |                    | 3.19                 | 1.43               | 0.32    | 14  |                                     |                                     |        |       |           |      |                |    |                     | 4.4                 | 35.33  |
|                                             | Cky1    | *                  | 2.90                 | 1.42               | 0.26    | 26  |                                     |                                     |        |       |           |      |                |    |                     | 7.9                 |        |
|                                             | Cky2    | *                  | 2.67                 | 1.42               | 0.35    | 42  |                                     |                                     |        |       |           |      |                |    |                     | 10.3                |        |
|                                             | Cky3    | *                  | 2.49                 | 1.44               | 0.26    | 48  |                                     |                                     |        |       |           |      |                |    |                     | 12.7                |        |
| (*) secondary gypsum abundance: few; common |         |                    |                      |                    |         |     |                                     |                                     |        |       |           |      |                |    |                     |                     |        |
| Castejón-SS                                 | Ah      | 53                 | 15.2                 | 1.14               | 0.22    | 25  | 56.8                                |                                     |        |       |           |      |                |    |                     | 33.9                | 52.06  |
|                                             | Cy      | 79                 | 8.2                  | 1.07               | 0.17    | 25  | 59.8                                |                                     |        |       |           |      |                |    |                     | 18.1                |        |

| profile CODE | genetic | gypsum             | SOC stock components |                    |         |    | pedotransfer function BULK DENSITY: |                                     |        |       |           |      |                |    |                     | SOCDi               | Σ SOCDi |
|--------------|---------|--------------------|----------------------|--------------------|---------|----|-------------------------------------|-------------------------------------|--------|-------|-----------|------|----------------|----|---------------------|---------------------|---------|
|              | horizon | mg·g <sup>-1</sup> | OCi                  | BD                 | Gi      | ti | sand                                | BD = 1.398-0.138(SOC) + 0.008(Sand) |        |       |           |      |                |    |                     |                     |         |
|              |         |                    | mg·g <sup>-1</sup>   | g·cm <sup>-3</sup> | decimal | cm | %                                   | cons.1                              | cons.2 | % SOC | c2*(%SOC) | sand | 0.008*(% sand) | BD | Mg·ha <sup>-1</sup> | Mg·ha <sup>-1</sup> |         |
| Castejón-BS  | Ah1     | 36                 | 34.5                 | 0.96               | 0.06    | 25 | 63.6                                |                                     |        |       |           |      |                |    | 78.2                | 214.84              |         |
|              | Ah2     | 27                 | 29.2                 | 0.99               | 0.01    | 25 | 62.7                                |                                     |        |       |           |      |                |    | 71.4                |                     |         |
|              | By      | 84                 | 7.4                  | 1.01               | 0.00    | 50 | 61.9                                |                                     |        |       |           |      |                |    | 37.4                |                     |         |
|              | Cy      | 61                 | 10.4                 | 1.19               | 0.25    | 30 | 55.1                                |                                     |        |       |           |      |                |    | 27.8                |                     |         |
| Castejón-FS  | Ah1     | 6                  | 32.9                 | 1.02               | 0.03    | 30 | 61.4                                |                                     |        |       |           |      |                |    | 97.9                | 190.82              |         |
|              | Bwy     | 38                 | 17.4                 | 1.21               | 0.03    | 25 | 54.2                                |                                     |        |       |           |      |                |    | 51.2                |                     |         |
|              | By      | 56                 | 4.7                  | 1.23               | 0.03    | 55 | 53.4                                |                                     |        |       |           |      |                |    | 31.0                |                     |         |
|              | Cy      | 58                 | 2.1                  | 1.31               | 0.03    | 40 | 50.4                                |                                     |        |       |           |      |                |    | 10.7                |                     |         |
| Castejón-TS  | Ah      | 11                 | 20.2                 | 1.04               | 0.39    | 15 | 60.6                                |                                     |        |       |           |      |                |    | 19.3                | 93.13               |         |
|              | By      | 44                 | 9.2                  | 1.33               | 0.60    | 45 | 50.0                                |                                     |        |       |           |      |                |    | 21.9                |                     |         |
|              | Cy      | 27                 | 5.4                  | 1.12               | 0.57    | 40 | 57.8                                |                                     |        |       |           |      |                |    | 10.4                |                     |         |
|              | 2Az     | 15                 | 8.1                  | 1.13               | 0.09    | 50 | 57.5                                |                                     |        |       |           |      |                |    | 41.5                |                     |         |

Porosity **45%**. i.e. for 1cm3 soil, assume RD of 2.65 g/cm3 1.00 cm3 - **0.45** cm3 = **0.55 x 2.65** g/cm3 = 1.46 g/cm3

|                 |     |      |      |  |      |    |    |       |       |       |        |    |       |      |      |        |
|-----------------|-----|------|------|--|------|----|----|-------|-------|-------|--------|----|-------|------|------|--------|
| Torre la Piedra | Ap1 | 2.1  | 17.5 |  | 0.06 | 10 | 9  | 1.398 | 0.138 | 1.750 | 0.2415 | 9  | 0.072 | 1.23 | 20.2 | 136.76 |
|                 | Ap2 | 5.6  | 16.3 |  | 0.05 | 20 | 7  | 1.398 | 0.138 | 1.630 | 0.2249 | 7  | 0.056 | 1.23 | 38.1 |        |
|                 | By  | 61.4 | 5.7  |  | 0.04 | 30 | 43 | 1.398 | 0.138 | 0.570 | 0.0787 | 43 | 0.344 | 1.66 | 27.3 |        |
|                 | Cy1 | 26.6 | 4.5  |  | 0.06 | 40 | 15 | 1.398 | 0.138 | 0.450 | 0.0621 | 15 | 0.120 | 1.46 | 24.6 |        |
|                 | Cy2 | 11.4 | 3.4  |  | 0.07 | 60 | 6  | 1.398 | 0.138 | 0.340 | 0.0469 | 6  | 0.048 | 1.40 | 26.5 |        |
| Torre Fierro    | Ap  | 0    | 25.6 |  | 0.15 | 10 | 17 | 1.398 | 0.138 | 2.560 | 0.3533 | 17 | 0.136 | 1.18 | 25.7 | 122.50 |
|                 | ABk | 0    | 14.3 |  | 0.07 | 20 | 16 | 1.398 | 0.138 | 1.430 | 0.1973 | 16 | 0.128 | 1.33 | 35.3 |        |
|                 | Bwk | 0    | 8.2  |  | 0.01 | 40 | 8  | 1.398 | 0.138 | 0.820 | 0.1132 | 8  | 0.064 | 1.35 | 43.8 |        |

| profile CODE    | genetic | gypsum             | SOC stock components |                    |         |    | pedotransfer function BULK DENSITY: |                                     |        |       |           |      |                |      | SOCDi               | Σ SOCDi             |
|-----------------|---------|--------------------|----------------------|--------------------|---------|----|-------------------------------------|-------------------------------------|--------|-------|-----------|------|----------------|------|---------------------|---------------------|
|                 |         |                    | OCi                  | BD                 | Gi      | ti | sand                                | BD = 1.398-0.138(SOC) + 0.008(Sand) |        |       |           |      |                |      |                     |                     |
|                 | horizon | mg·g <sup>-1</sup> | mg·g <sup>-1</sup>   | g·cm <sup>-3</sup> | decimal | cm | %                                   | cons.1                              | cons.2 | % SOC | c2*(%SOC) | sand | 0.008*(% sand) | BD   | Mg·ha <sup>-1</sup> | Mg·ha <sup>-1</sup> |
|                 | Cy      | 47.9               | 3.6                  |                    | 0.01    | 30 | 38                                  | 1.398                               | 0.138  | 0.360 | 0.0497    | 38   | 0.304          | 1.65 | 17.7                |                     |
| La Plana Yesosa | Ah      | 0                  | 14.2                 |                    | 0.26    | 30 | 30                                  | 1.398                               | 0.138  | 1.420 | 0.1960    | 30   | 0.240          | 1.44 | 45.5                | 112.47              |
|                 | Bw      | 0                  | 11.2                 |                    | 0.05    | 20 | 30                                  | 1.398                               | 0.138  | 1.120 | 0.1546    | 30   | 0.240          | 1.48 | 31.6                |                     |
|                 | By1     | 93.7               | 3.5                  |                    | 0.00    | 50 | 23                                  | 1.398                               | 0.138  | 0.350 | 0.0483    | 23   | 0.184          | 1.53 | 26.8                |                     |
|                 | By2     | 90.3               | 2.1                  |                    | 0.16    | 30 | 32                                  | 1.398                               | 0.138  | 0.210 | 0.0290    | 32   | 0.256          | 1.63 | 8.6                 |                     |
| Colmenar II     | Ap      | 60.6               | 5.2                  | 1.23               | 0.19    | 17 | 48                                  | 1.398                               | 0.138  | 0.520 | 0.0718    | 48   | 0.384          | 1.71 | 12.2                | 31.33               |
|                 | ABy     | 59.6               | 3.7                  | 1.59               | 0.22    | 15 | 44                                  | 1.398                               | 0.138  | 0.370 | 0.0511    | 44   | 0.352          | 1.70 | 7.4                 |                     |
|                 | By      | 54.1               | 1.8                  | 1.37               | 0.27    | 18 | 44                                  | 1.398                               | 0.138  | 0.180 | 0.0248    | 44   | 0.352          | 1.73 | 4.1                 |                     |
|                 | Cy1     | 43.8               | 0.8                  |                    | 0.13    | 29 | 26                                  | 1.398                               | 0.138  | 0.080 | 0.0110    | 26   | 0.208          | 1.59 | 3.2                 |                     |
|                 | Cy2     | 44.7               | 0.8                  |                    | 0.18    | 43 | 23                                  | 1.398                               | 0.138  | 0.080 | 0.0110    | 23   | 0.184          | 1.57 | 4.4                 |                     |
| Mequinenza      | Ap      | 17                 | 11.0                 |                    | 0.34    | 20 | 32                                  | 1.398                               | 0.138  | 1.100 | 0.1518    | 32   | 0.256          | 1.50 | 21.8                | 43.32               |
|                 | By1     | 74                 | 3.0                  |                    | 0.04    | 30 | 23                                  | 1.398                               | 0.138  | 0.300 | 0.0414    | 23   | 0.184          | 1.54 | 13.3                |                     |
|                 | By2     | 81                 | 2.0                  |                    | 0.16    | 30 | 32                                  | 1.398                               | 0.138  | 0.200 | 0.0276    | 32   | 0.256          | 1.63 | 8.2                 |                     |
| Raplee, Utah    | A       | 13                 | 3.8                  |                    | 0.18    | 3  | 56                                  | 1.398                               | 0.138  | 0.380 | 0.0524    | 56   | 0.448          | 1.79 | 1.7                 | 20.38               |
|                 | By1     | 22                 | 0.7                  |                    | 0.34    | 20 | 73                                  | 1.398                               | 0.138  | 0.070 | 0.0097    | 73   | 0.584          | 1.97 | 1.8                 |                     |
|                 | By2     | 22                 | 0.7                  | 1.31               | 0.52    | 28 | 74                                  | 1.398                               | 0.138  | 0.070 | 0.0097    | 74   | 0.592          | 1.98 | 1.9                 |                     |
|                 | By3     | 21                 | 1.1                  | 1.46               | 0.07    | 35 | 59                                  | 1.398                               | 0.138  | 0.110 | 0.0152    | 59   | 0.472          | 1.85 | 6.6                 |                     |
|                 | By4     | 10                 | 0.7                  | 1.56               | 0.05    | 29 | 58                                  | 1.398                               | 0.138  | 0.070 | 0.0097    | 58   | 0.464          | 1.85 | 3.6                 |                     |
|                 | By5     | 14                 | 1                    |                    | 0.46    | 45 | 74                                  | 1.398                               | 0.138  | 0.100 | 0.0138    | 74   | 0.592          | 1.98 | 4.8                 |                     |
| Arntz, Arizona  | A       | 0                  | 4.6                  | 1.51               | 0.00    | 5  | 79                                  | 1.398                               | 0.138  | 0.460 | 0.0635    | 79   | 0.632          | 1.97 | 4.5                 | 48.99               |
|                 | Bw1     | 0                  | 2.7                  | 1.53               | 0.00    | 10 | 80                                  | 1.398                               | 0.138  | 0.270 | 0.0373    | 80   | 0.640          | 2.00 | 5.4                 |                     |
|                 | Bw2     | 0                  | 3.1                  | 1.51               | 0.00    | 15 | 65                                  | 1.398                               | 0.138  | 0.310 | 0.0428    | 65   | 0.520          | 1.88 | 8.7                 |                     |

| profile CODE   | genetic | gypsum             | SOC stock components |                    |         |    | pedotransfer function BULK DENSITY: |                                     |        |       |           |      |                |      | SOCDi               | Σ SOCDi             |
|----------------|---------|--------------------|----------------------|--------------------|---------|----|-------------------------------------|-------------------------------------|--------|-------|-----------|------|----------------|------|---------------------|---------------------|
|                | horizon | mg·g <sup>-1</sup> | OCi                  | BD                 | Gi      | ti | sand                                | BD = 1.398-0.138(SOC) + 0.008(Sand) |        |       |           |      |                |      |                     |                     |
|                |         |                    | mg·g <sup>-1</sup>   | g·cm <sup>-3</sup> | decimal | cm | %                                   | cons.1                              | cons.2 | % SOC | c2*(%SOC) | sand | 0.008*(% sand) | BD   | Mg·ha <sup>-1</sup> | Mg·ha <sup>-1</sup> |
|                | 2By1    | 43                 | 2.5                  | 1.26               | 0.00    | 39 | 56                                  | 1.398                               | 0.138  | 0.250 | 0.0345    | 56   | 0.448          | 1.81 | 17.7                |                     |
|                | 2By2    | 32                 | 1.6                  |                    | 0.00    | 12 | 50                                  | 1.398                               | 0.138  | 0.160 | 0.0221    | 50   | 0.400          | 1.78 | 3.4                 |                     |
|                | 3CRy    | 28                 | 0.8                  |                    | 0.03    | 26 | 48                                  | 1.398                               | 0.138  | 0.080 | 0.0110    | 48   | 0.384          | 1.77 | 3.6                 |                     |
|                | 4CRy    | 31                 | 0.4                  |                    | 0.00    | 33 | 46                                  | 1.398                               | 0.138  | 0.040 | 0.0055    | 46   | 0.368          | 1.76 | 2.3                 |                     |
|                | 5CRy    | 12                 | 0.5                  | 1.71               | 0.00    | 38 | 48                                  | 1.398                               | 0.138  | 0.050 | 0.0069    | 48   | 0.384          | 1.78 | 3.4                 |                     |
| Awall, Arizona | A       | 0                  | 8.1                  |                    | 0.45    | 5  | 34                                  | 1.398                               | 0.138  | 0.810 | 0.1118    | 34   | 0.272          | 1.56 | 3.5                 | 31.96               |
|                | Bk1     | 0                  | 3.9                  |                    | 0.33    | 20 | 50                                  | 1.398                               | 0.138  | 0.390 | 0.0538    | 50   | 0.400          | 1.74 | 9.1                 |                     |
|                | Bk2     | 0                  | 3.5                  |                    | 0.49    | 21 | 50                                  | 1.398                               | 0.138  | 0.350 | 0.0483    | 50   | 0.400          | 1.75 | 6.6                 |                     |
|                | Bky     | 1                  | 4.3                  |                    | 0.71    | 35 | 56                                  | 1.398                               | 0.138  | 0.430 | 0.0593    | 56   | 0.448          | 1.79 | 7.8                 |                     |
|                | 2By     | 25                 | 1.8                  |                    | 0.74    | 41 | 59                                  | 1.398                               | 0.138  | 0.180 | 0.0248    | 59   | 0.472          | 1.85 | 3.5                 |                     |
|                | 3By     | 13                 | 0.6                  |                    | 0.69    | 40 | 74                                  | 1.398                               | 0.138  | 0.060 | 0.0083    | 74   | 0.592          | 1.98 | 1.5                 |                     |
